# Supplementary material for: Asymptomatic Cryptosporidiosis in Children Living with HIV
Source: MDPI journal article supplement (doi:10.3390/tropicalmed7110352), 2022-11-04
Supplement: s1 [file s1]

## Supplementary File

**Table S1.** Risk Behavior of Cryptosporidiosis-Positive Children Living With HIV. In Contrast to Drinking Water Treatment.

| <b>Parameter<sup>‡</sup></b>         | <b>Total<br/>(N= 22)</b> | <b>Boiled<br/>(N = 14)</b> | <b>Not boiled<br/>(N = 8)</b> |
|--------------------------------------|--------------------------|----------------------------|-------------------------------|
| Diarrhea                             |                          |                            |                               |
| No                                   | 14 (63.6)                | 9 (64.3)                   | 5 (62.5)                      |
| Yes                                  | 8 (36.4)                 | 5 (35.7)                   | 3 (37.5)                      |
| Exposure to river water              |                          |                            |                               |
| No                                   | 17 (77.3)                | 11 (78.6)                  | 6 (75.0)                      |
| Yes                                  | 5 (22.7)                 | 3 (21.4)                   | 2 (25.0)                      |
| Contact with diarrheic family member |                          |                            |                               |
| No                                   | 16 (72.7)                | 10 (71.4)                  | 6 (75.0)                      |
| Yes                                  | 6 (27.3)                 | 4 (28.6)                   | 2 (25.0)                      |
| Contact with animals                 |                          |                            |                               |
| No                                   | 7 (31.8)                 | 5 (35.7)                   | 2 (25.0)                      |
| Yes                                  | 15 (68.2)                | 9 (64.3)                   | 6 (75.0)                      |
| Raw vegetable consumption            |                          |                            |                               |
| No                                   | 15 (68.2)                | 10 (71.4)                  | 5 (62.5)                      |
| Yes                                  | 7 (31.8)                 | 4 (28.6)                   | 3 (37.5)                      |
| Well water for drinking              |                          |                            |                               |
| Yes                                  | 18 (81.8)                | 14 (100)                   | 4 (50.0)                      |
| No                                   | 4 (18.2)                 | 0                          | 4 (50.0)                      |

<sup>‡</sup>presented in frequency (%)
